# Supplementary material for: Thorough analysis of Iranian spearmint essential oil: combination of chemometrics and gas chromatography-mass spectrometry
Source: Royal Society of Chemistry journal article supplement (doi:10.1039/c3ay42215a), 2014-03-07

**Supplementary information:**

**Figure S1.** Morphological score plots of peak clusters, (a) A (b) B

**Figure S2.** FSMW-EFA plots of peak clusters, (a) A (b) B

**Figure S3.** Pure concentration profiles of peak clusters, (a) A (b) B

**Figure S4.** Pure mass spectra of peak clusters, (a) A (b) B

Figure S1.

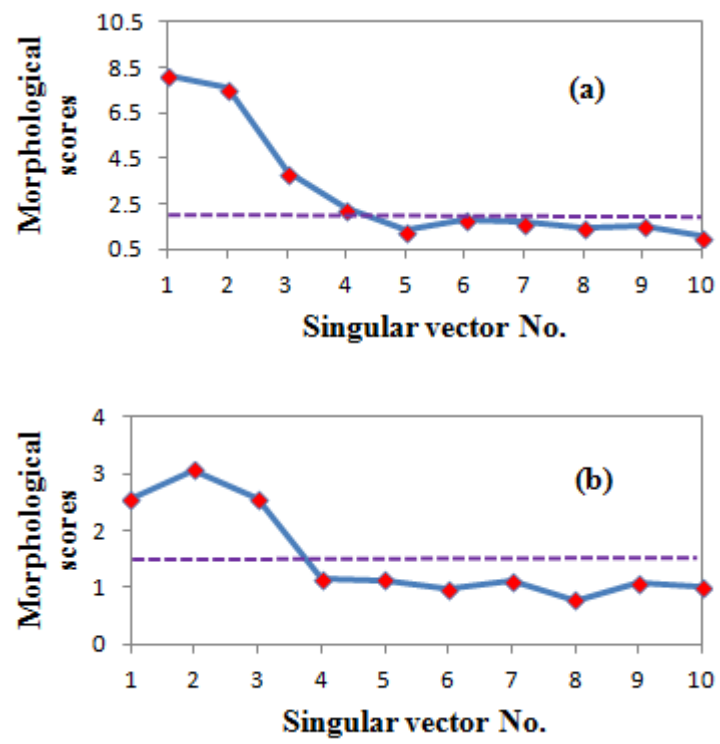

Figure S2.

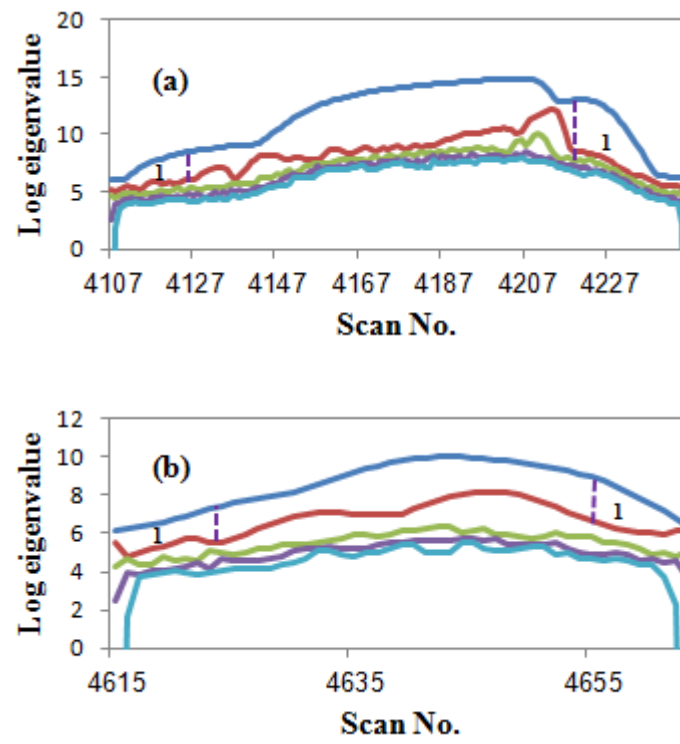

Figure S3.

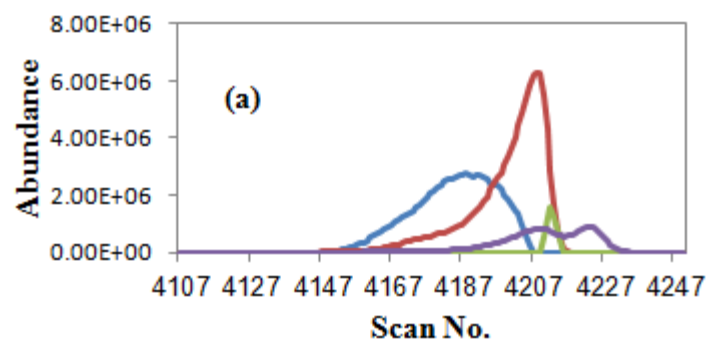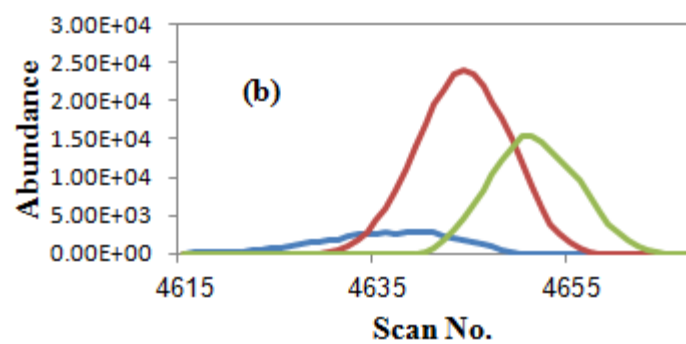

Figure S4.

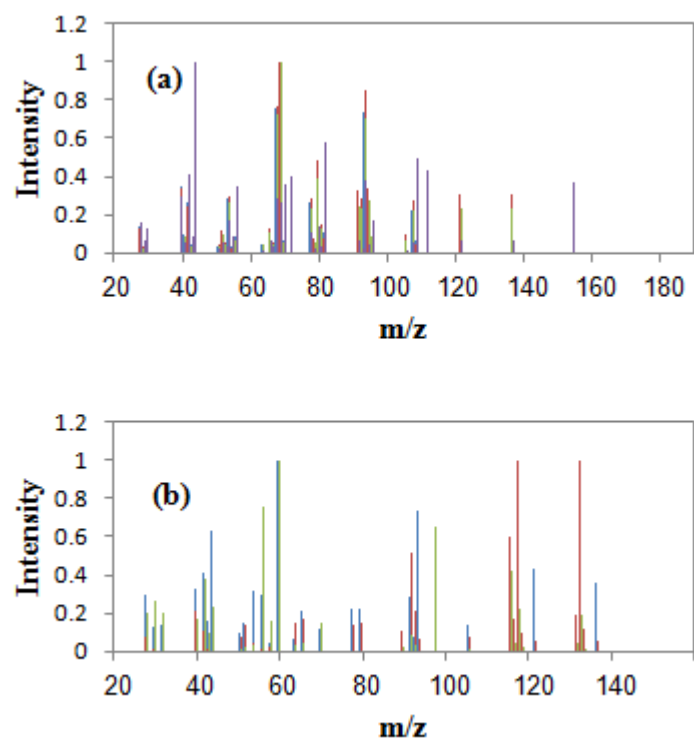

Supplement: c3ay42215a1.pdf [file c3ay42215a1.pdf]
